# Supplementary material for: Drosophila Xpd Regulates Cdk7 Localization, Mitotic Kinase Activity, Spindle Dynamics, and Chromosome Segregation
Source: PubMed Central journal article supplement (PMC2837399; doi:10.1371/journal.pgen.1000876), 2010-03-12
Supplement: pgen.1000876.s001.pdf [file pgen.1000876.s001.pdf]

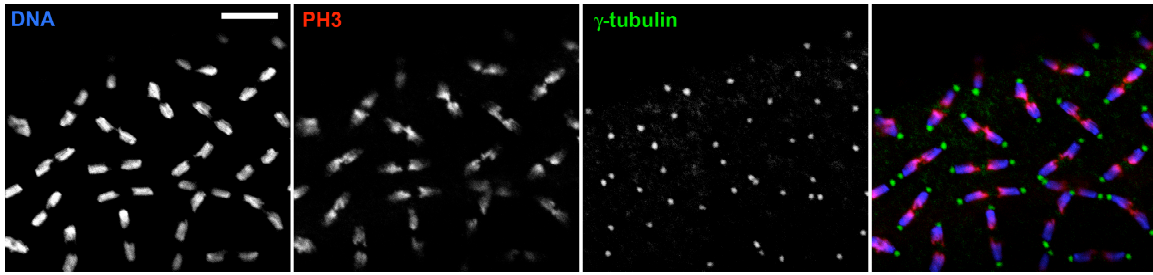

**Figure S1: Lack of Xpd does not cause centrosome inactivation.** Proper  $\gamma$ -tubulin localization to the centrosomes of a cycle 12 *xpd<sup>EE</sup>* embryo with delayed histone H3 dephosphorylation in anaphase. Scale bar represents 10  $\mu\text{m}$ .
